# Supplementary material for: DeepPVP: phenotype-based prioritization of causative variants using deep learning
Source: PubMed Central journal article supplement (PMC6364462; doi:10.1186/s12859-019-2633-8), 2019-02-06
Supplement: 12859_2019_2633_MOESM1_ESM.pdf [file 12859_2019_2633_MOESM1_ESM.pdf]

Table 1: DeepPVP model features.

| Feature                                 | Type                                                                                       |
|-----------------------------------------|--------------------------------------------------------------------------------------------|
| Pathogenicity prediction                | CADD score (numeric)                                                                       |
|                                         | GWAVA score (numeric)                                                                      |
|                                         | DANN score (numeric)                                                                       |
|                                         | PhenomeNet similarity score (numeric)                                                      |
| Phenotype-related                       | Disease inheritance mode: Dominant, Recessive, X-linked, Others/Unknown (one-hot encoding) |
|                                         | High-level phenotype HP_0000078(binary)                                                    |
|                                         | High-level phenotype HP_0000291(binary)                                                    |
|                                         | High-level phenotype HP_0000708(binary)                                                    |
|                                         | High-level phenotype HP_0001901(binary)                                                    |
|                                         | High-level phenotype HP_0001939(binary)                                                    |
|                                         | High-level phenotype HP_0002086(binary)                                                    |
|                                         | High-level phenotype HP_0006476(binary)                                                    |
|                                         | High-level phenotype HP_0009126(binary)                                                    |
|                                         | High-level phenotype HP_0010515(binary)                                                    |
|                                         | High-level phenotype HP_0010948(binary)                                                    |
|                                         | High-level phenotype HP_0010987(binary)                                                    |
|                                         | High-level phenotype HP_0011017(binary)                                                    |
|                                         | High-level phenotype HP_0011025(binary)                                                    |
|                                         | High-level phenotype HP_0011277(binary)                                                    |
|                                         | High-level phenotype HP_0011482(binary)                                                    |
|                                         | High-level phenotype HP_0011915(binary)                                                    |
|                                         | High-level phenotype HP_0040063(binary)                                                    |
|                                         | High-level phenotype MP_0000003(binary)                                                    |
|                                         | High-level phenotype MP_0000358(binary)                                                    |
|                                         | High-level phenotype MP_0000428(binary)                                                    |
|                                         | High-level phenotype MP_0000462(binary)                                                    |
|                                         | High-level phenotype MP_0000516(binary)                                                    |
|                                         | High-level phenotype MP_0000685(binary)                                                    |
|                                         | High-level phenotype MP_0000716(binary)                                                    |
|                                         | High-level phenotype MP_0001188(binary)                                                    |
|                                         | High-level phenotype MP_0001213(binary)                                                    |
|                                         | High-level phenotype MP_0001270(binary)                                                    |
|                                         | High-level phenotype MP_0001533(binary)                                                    |
|                                         | High-level phenotype MP_0001663(binary)                                                    |
|                                         | High-level phenotype MP_0001672(binary)                                                    |
|                                         | High-level phenotype MP_0001764(binary)                                                    |
|                                         | High-level phenotype MP_0001790(binary)                                                    |
|                                         | High-level phenotype MP_0001983(binary)                                                    |
|                                         | High-level phenotype MP_0002060(binary)                                                    |
|                                         | High-level phenotype MP_0002089(binary)                                                    |
|                                         | High-level phenotype MP_0002095(binary)                                                    |
|                                         | High-level phenotype MP_0002106(binary)                                                    |
|                                         | High-level phenotype MP_0002109(binary)                                                    |
|                                         | High-level phenotype MP_0002138(binary)                                                    |
|                                         | High-level phenotype MP_0002139(binary)                                                    |
|                                         | High-level phenotype MP_0002163(binary)                                                    |
|                                         | High-level phenotype MP_0002164(binary)                                                    |
|                                         | High-level phenotype MP_0002396(binary)                                                    |
|                                         | High-level phenotype MP_0003385(binary)                                                    |
|                                         | High-level phenotype MP_0004133(binary)                                                    |
|                                         | High-level phenotype MP_0004134(binary)                                                    |
|                                         | High-level phenotype MP_0005408(binary)                                                    |
|                                         | High-level phenotype MP_0005451(binary)                                                    |
|                                         | High-level phenotype MP_0005621(binary)                                                    |
| High-level phenotype MP_0009389(binary) |                                                                                            |
| High-level phenotype MP_0010678(binary) |                                                                                            |
| High-level phenotype MP_0010769(binary) |                                                                                            |
| High-level phenotype MP_0012719(binary) |                                                                                            |
| High-level phenotype MP_0013328(binary) |                                                                                            |
| Genotype                                | Homozygote or heterozygote (binary)                                                        |
| Imputation Flags                        | CADD flag (binary)                                                                         |
|                                         | GWAVA flag (binary)                                                                        |
|                                         | DANN flag (binary)                                                                         |
|                                         | PhenomeNet similarity flag (binary)                                                        |
